# Supplementary material for: Neuroimaging signatures and a deep learning modeling for early diagnosing and predicting non-pharmacological therapy success for subclinical depression comorbid sleep disorders in college students
Source: PubMed Central journal article supplement — Int J Clin Health Psychol. 2024 Dec 12;24(4):100526. doi: 10.1016/j.ijchp.2024.100526 (PMC11699106; doi:10.1016/j.ijchp.2024.100526), 2024-12-12
Supplement: mmc1.pdf [file mmc1.pdf]

Supplementary File. Functional connectivity alterations between post-sDSDs and post-HCs

**Supplementary Table 1. The altered rsFCs related to sub-DMN within HCs group  
(after > before)**

| Brain Regions (AAL) | MNI Coordinates |     |     | T value | Cluster size |
|---------------------|-----------------|-----|-----|---------|--------------|
|                     | X               | Y   | Z   |         |              |
| ROI 1: ACC_L (aDMN) |                 |     |     |         |              |
| Cerebelum_8_R       | 18              | -44 | -60 | 4.6511  | 674          |
| Frontal_Inf_Orb_R   | 52              | 34  | -6  | 6.3613  | 301          |
| Frontal_Inf_Tri_R   | 44              | 34  | -2  | 5.6972  | 638          |
| ROI 2: ACC_R (aDMN) |                 |     |     |         |              |
| Cerebelum_6_R       | 16              | -76 | -18 | 5.5331  | 581          |
| Frontal_Inf_Orb_R   | 28              | 32  | -14 | 5.1944  | 319          |
| Calcarine_R         | 26              | -66 | 12  | 5.7192  | 216          |
| ROI 3: PCU_L (pDMN) |                 |     |     |         |              |
| Precentral_R        | -14             | -24 | 54  | 5.4122  | 511          |
| Frontal_Inf_Tri_L   | 44              | 34  | -6  | 5.7936  | 655          |
| Occipital_Inf_L     | -46             | -74 | -8  | 5.3391  | 613          |
| ROI 4: PCU_R (pDMN) |                 |     |     |         |              |
| Frontal_Mid_Orb_L   | -20             | 58  | -12 | 4.7716  | 365          |
| Precentral_L        | -26             | -18 | 60  | 4.7933  | 199          |

Note: Cerebelum\_8\_R, right Cerebellum\_8; Frontal\_Inf\_Orb\_R, right orbital part of the inferior frontal gyrus; Frontal\_Inf\_Tri\_R, right triangular part of the inferior frontal gyrus; Cerebelum\_6\_R, right Cerebellum\_6; Frontal\_Mid\_Orb\_L, left orbital part of the middle frontal gyrus; Calcarine\_R, right Calcarine; Precentral\_R, right precentral; Occipital\_Inf\_L, left inferior occipital gyrus; Precentral\_L, left precentral; HCs, healthy controls.

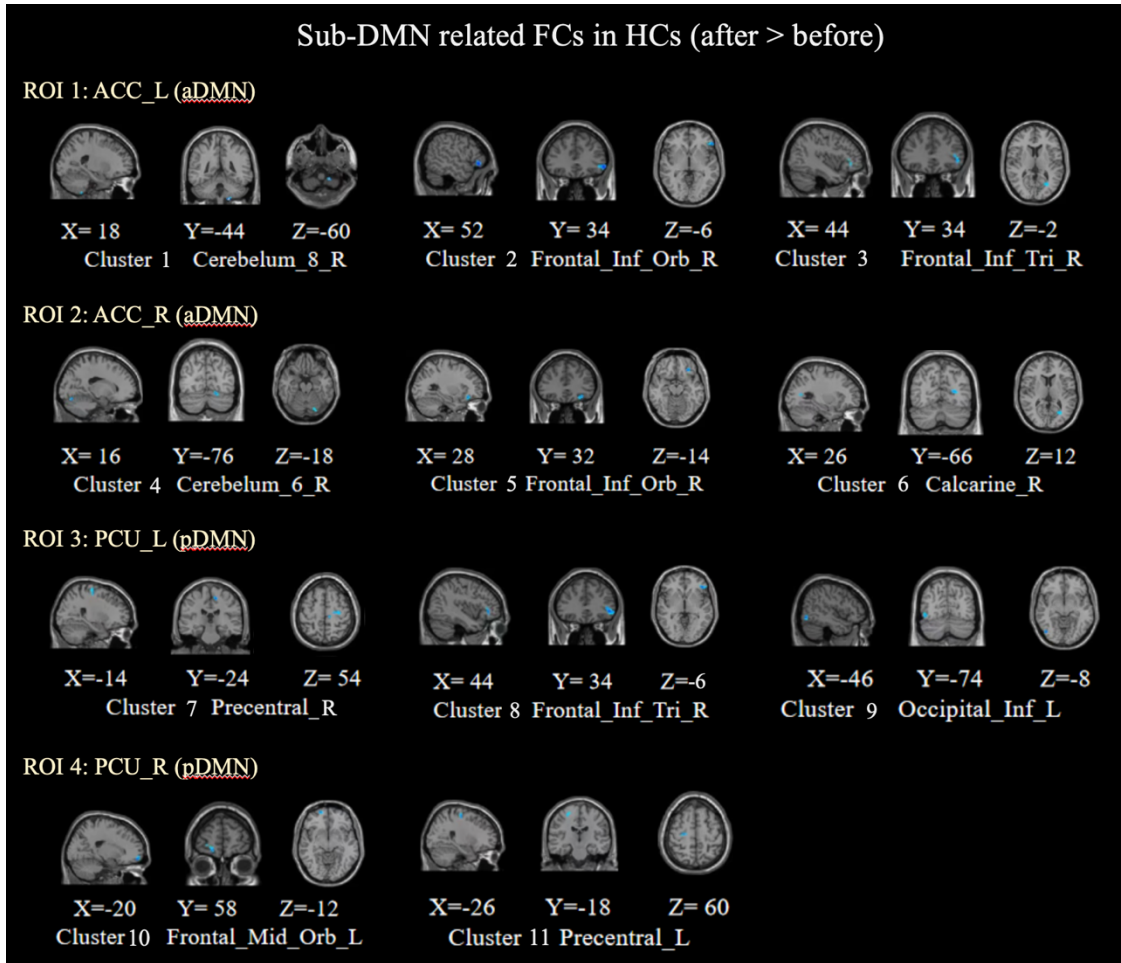

**Supplementary Figure 1. Brain regions showing altered FCs related to sub-DMN in HCs from post- to pre-scan.**

Note: Cerebellum\_8\_R, right Cerebellum\_8; Frontal\_Inf\_Orb\_R, right orbital part of the inferior frontal gyrus; Frontal\_Inf\_Tri\_R, right triangular part of the inferior frontal gyrus; Cerebellum\_6\_R, right Cerebellum\_6; Frontal\_Mid\_Orb\_L, left orbital part of the middle frontal gyrus; Calcarine\_R, right Calcarine; Precentral\_R, right precentral; Occipital\_Inf\_L, left inferior occipital gyrus; Precentral\_L, left precentral; HCs, healthy controls.

**Supplementary Table 2. The altered rsFCs related to sub-DMN between two groups after treatment (HC > sSDs)**

| Brain Regions (AAL)         | MNI Coordinates |     |     | T value | Cluster size |
|-----------------------------|-----------------|-----|-----|---------|--------------|
|                             | X               | Y   | Z   |         |              |
| ROI 2: The Right ACC (aDMN) |                 |     |     |         |              |
| Cerebellum_Crus1_L          | -21             | -63 | -56 | -5.3380 | 206          |
| Frontal_Inf_Orb_R           | -18             | 27  | 0   | 6.3104  | 262          |
| ROI 3: The Left PCU (pDMN)  |                 |     |     |         |              |
| Precentral_R                | 60              | -48 | -18 | 5.0375  | 646          |
| Parietal_Sup_R              | 48              | 43  | 79  | 4.0846  | 253          |

Note: Cerebelum\_Crus1\_L, left cerebellum crus1; Precentral\_R, right precentral; Parietal\_Sup\_R, right superior parietal gyrus; HC, healthy control; sSDs, subclinical depression with sleep disorders

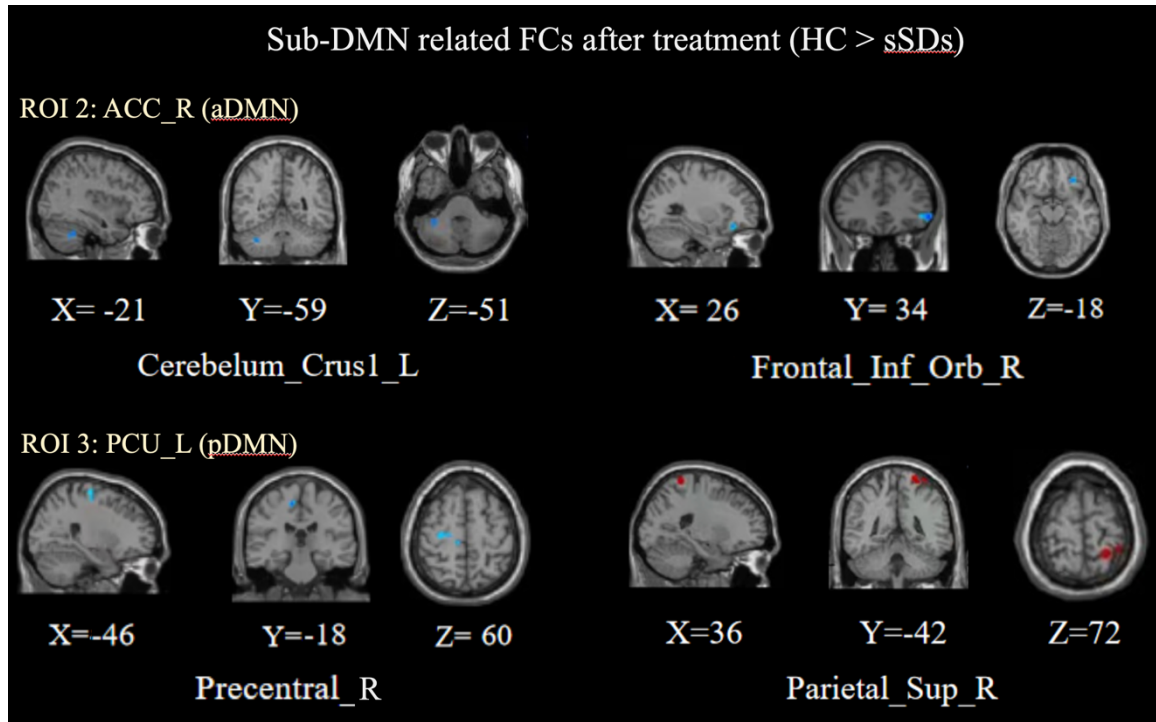

**Supplementary Figure 2: Brain regions showing changes in the patients with adolescent depression**

Note: Cerebelum\_Crus1\_L, left cerebellum crus1; Frontal\_Inf\_Orb\_R, right orbital part of the inferior frontal gyrus; Precentral\_R, right precentral; Parietal\_Sup\_R, right superior parietal gyrus; HC, healthy control.
